# Supplementary material for: Ru doping and interface engineering synergistically boost the electrocatalytic performance of a WP/WP2 nanosheet array for an efficient hydrogen evolution reaction
Source: Royal Society of Chemistry journal article supplement (doi:10.1039/d4nr01010h), 2024-01-01
Supplement: d4nr01010h1.pdf [file d4nr01010h1.pdf]

## Supporting Information

### **Ru doping and interface engineering synergistically boosting the electrocatalytic performance of WP/WP<sub>2</sub> nanosheet array for efficient hydrogen evolution reaction**

Zhichang Hu<sup>a</sup>, Zhizhong Xiao<sup>a</sup>, Wei Wei<sup>a</sup>, Jian Yang<sup>a</sup>, Xiaoyu Huang<sup>a</sup>, Qingcheng Lu<sup>a</sup>,  
Sundaram Chandrasekaran<sup>a</sup>, Huidan Lu<sup>\*a</sup>, and Yongping Liu<sup>\*a</sup>

*<sup>a</sup>Guangxi Key Laboratory of Electrochemical and Magneto-chemical Functional  
Materials, College of Chemistry and Bioengineering, Guilin University of Technology,  
Guilin 541004, P. R. China.*

\*Corresponding authors.

*E-mail address:* lhuidangl@163.com (Lu H); liuyp624@163.com (Liu Y)

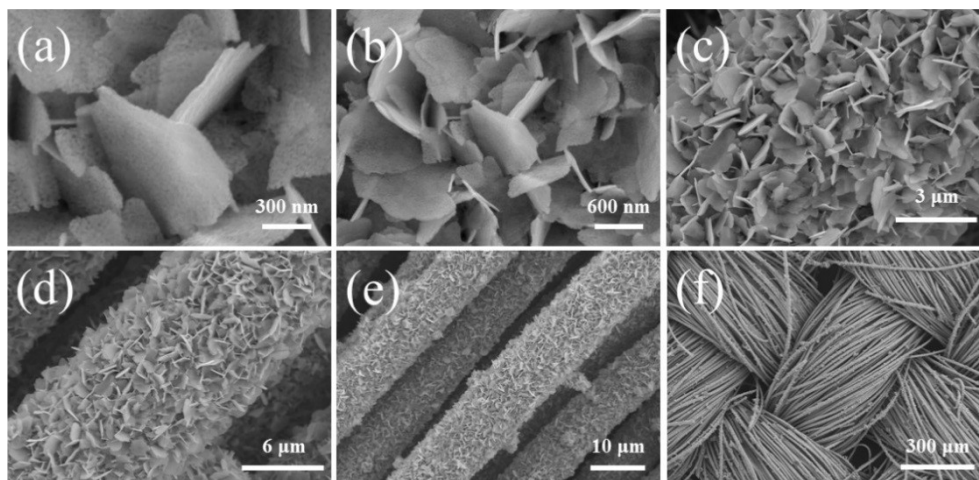

**Fig. S1.** SEM images of Ru-WO<sub>3</sub> NS/CC.

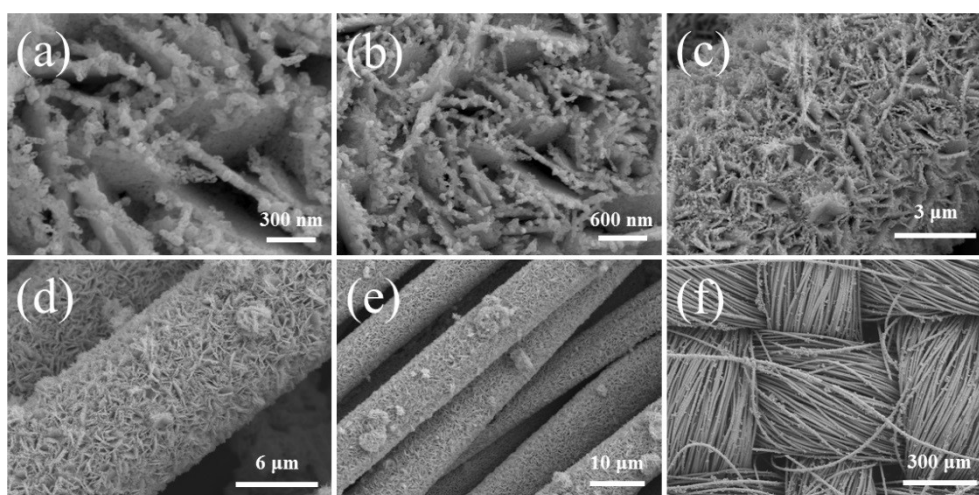

**Fig. S2.** SEM images of Ru-WP/WP<sub>2</sub> NH/CC.

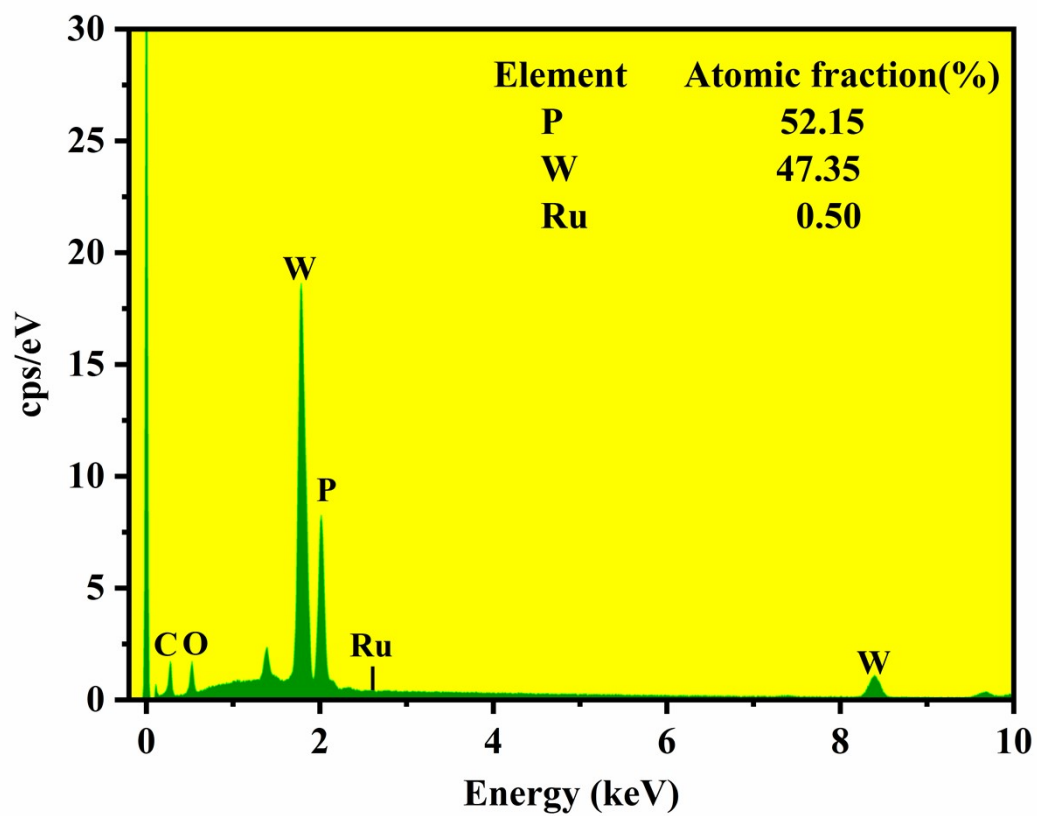

**Fig. S3.** EDS result of Ru-WP/WP<sub>2</sub> NH/CC.

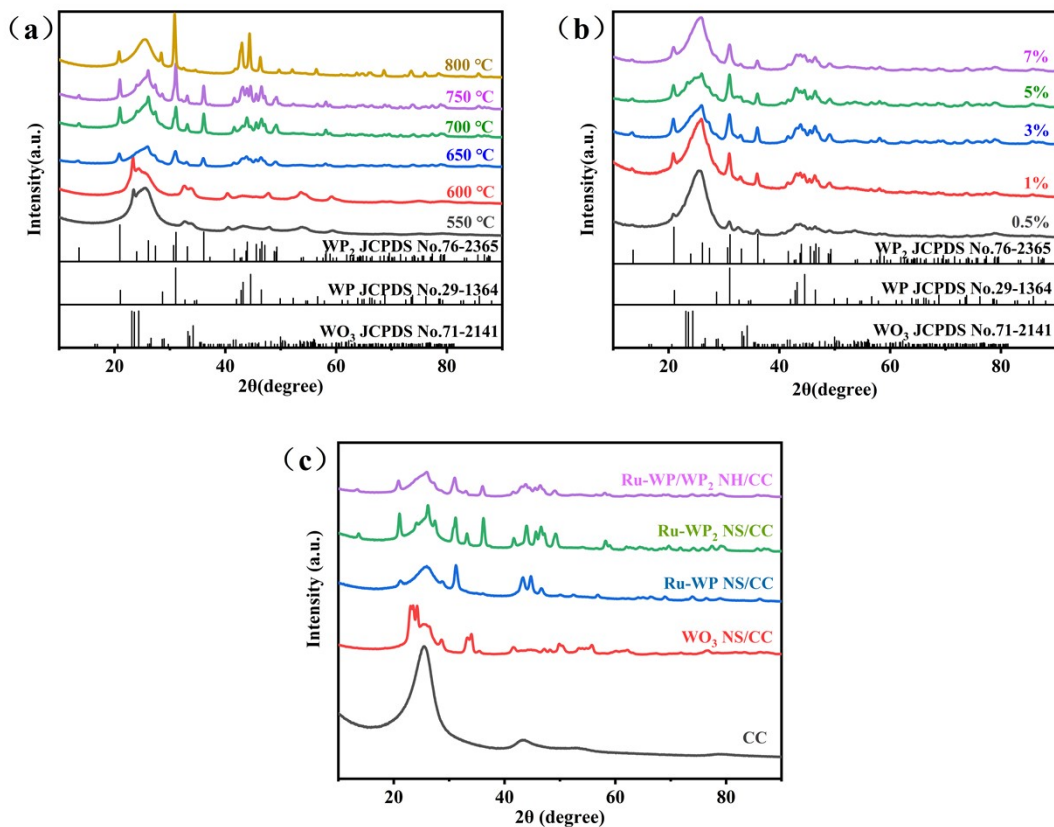

**Fig. S4.** XRD pattern of Ru catalyst. (a) Temperature optimization gradient. (b)

Different Ru doping. (c) Comparison with bare carbon cloth.

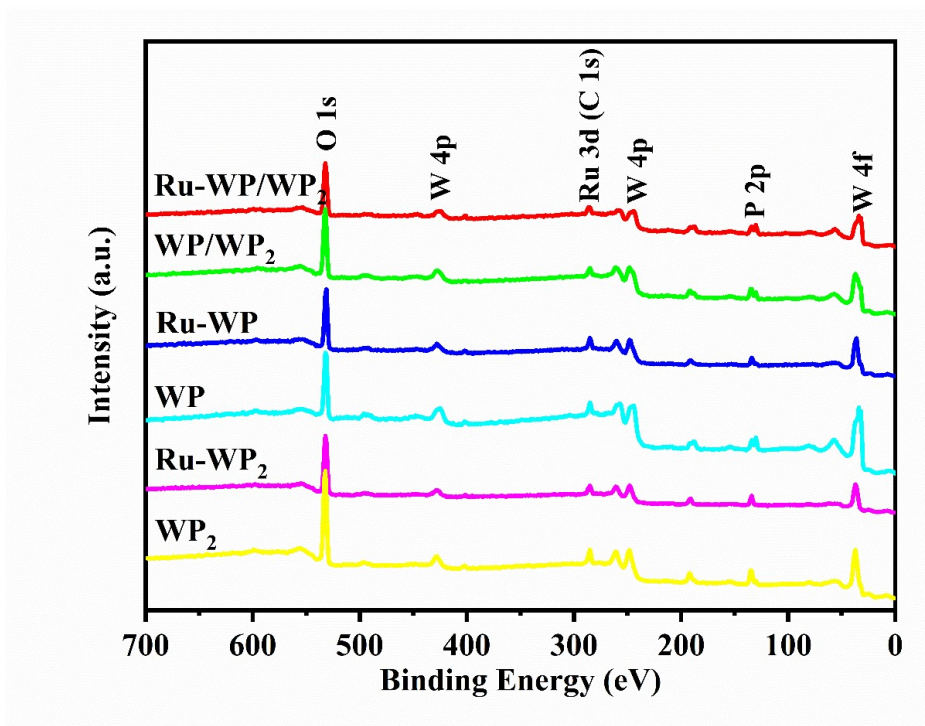

**Fig. S5.** XPS spectra of Survey spectrum.

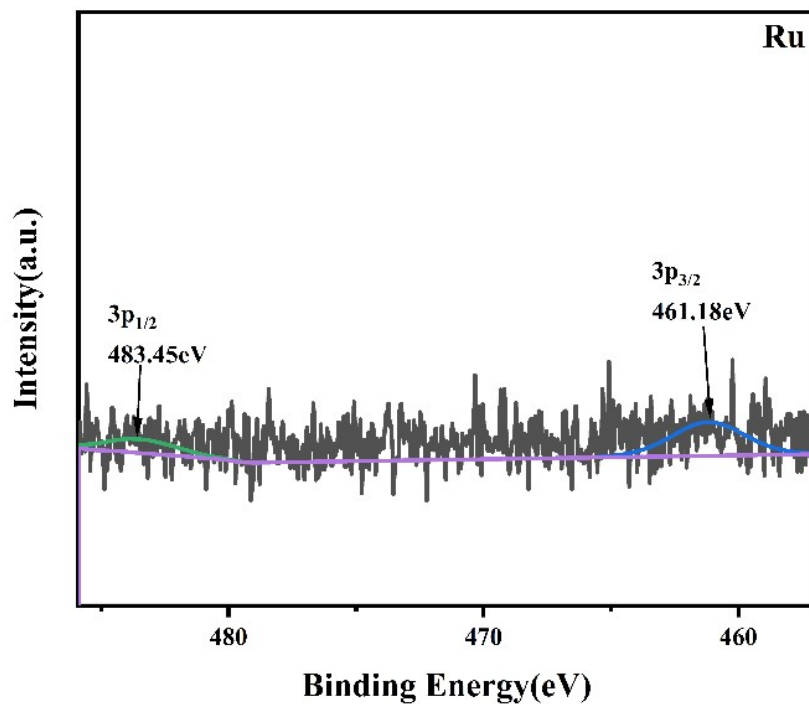

Fig. S6. XPS spectra of Ru 3p

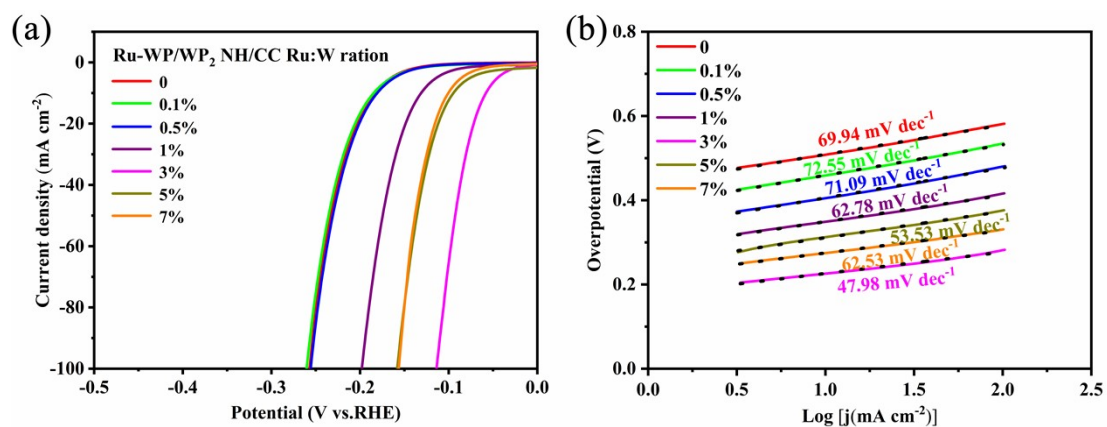

Fig. S7. The Ru: W ratio added to the precursor sample was optimized. (a) Linear sweep voltammetry of the catalyst at a scanning rate of  $5 \text{ mV s}^{-1}$ , and (b) Tafel slope.

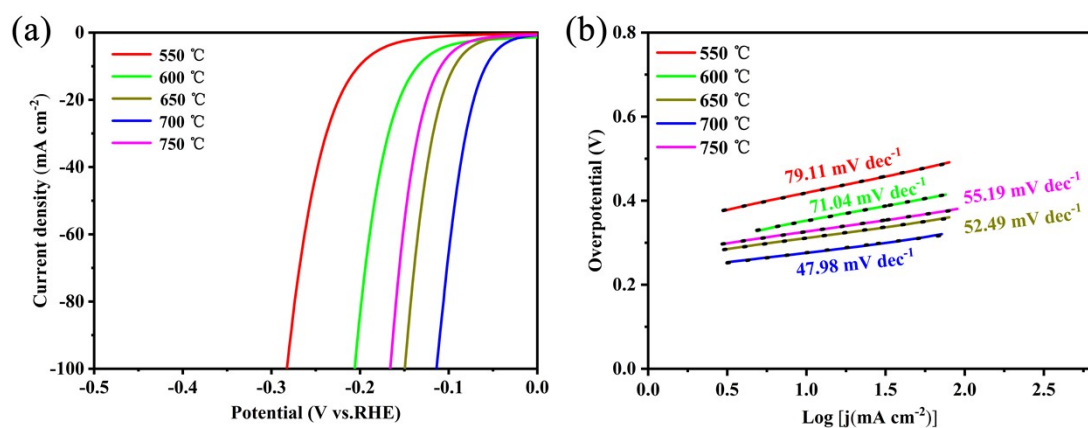

**Fig. S8.** Temperature gradient optimization of catalyst. (a) Linear sweep voltammetry of the catalyst at a scanning rate of  $5 \text{ mV s}^{-1}$  and (b) Tafel slope.

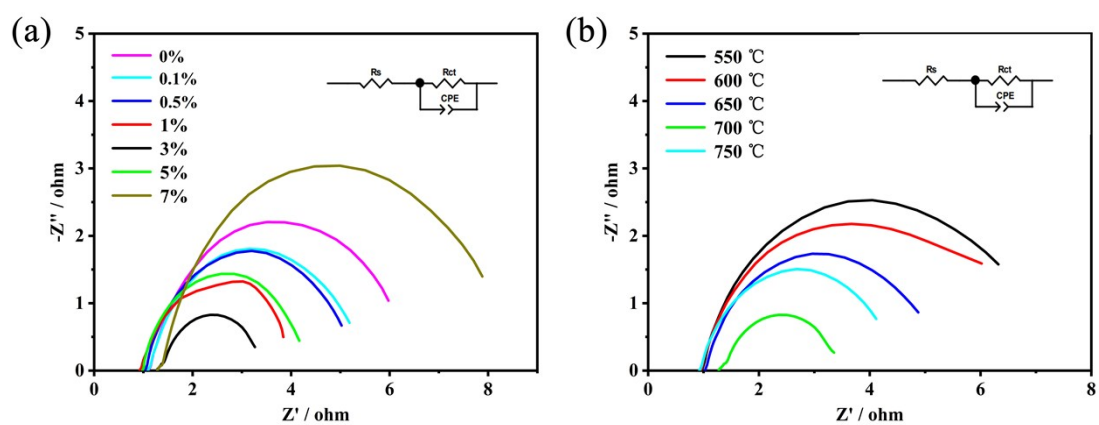

**Fig. S9.** Nyquist curves for (a) different Ru doping concentrations, and (b) different phosphating temperatures.

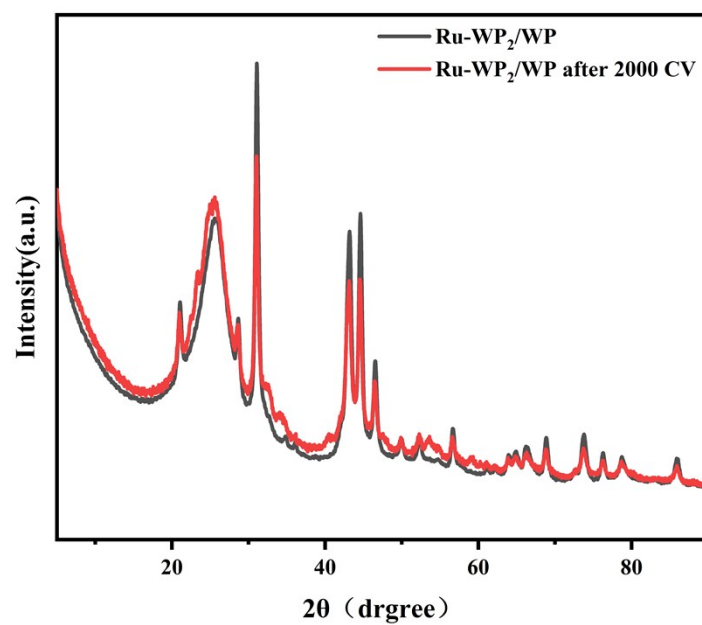

**Fig. S10.** XRD comparison of Ru-WP<sub>2</sub>/WP before and after 2000 cycles CV

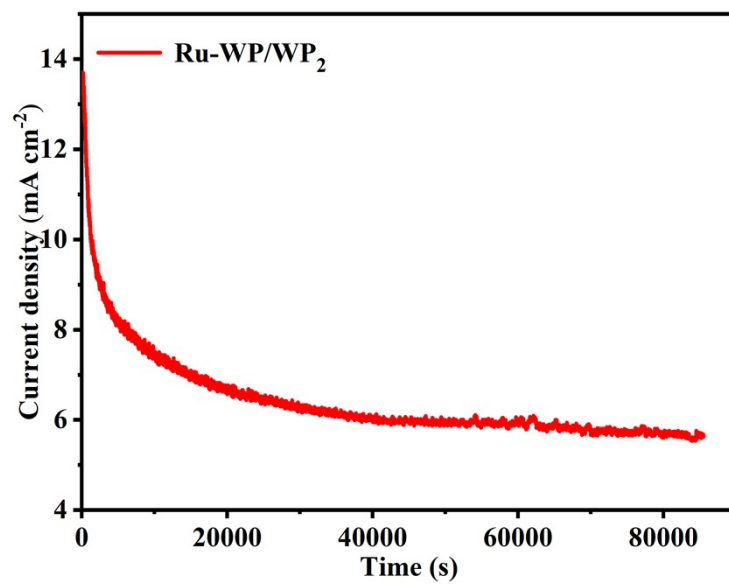

**Fig. S11.** The stability curve of 3% Ru-WP<sub>2</sub>/WP tested at 10 mA cm<sup>-2</sup>.

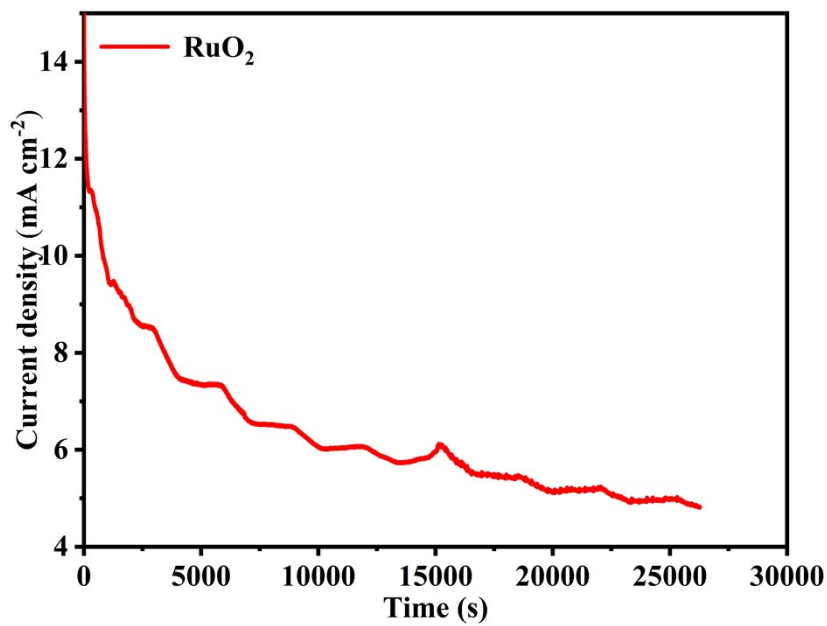

Fig. S12. The stability curve of RuO<sub>2</sub> tested at 10 mA cm<sup>-2</sup>.

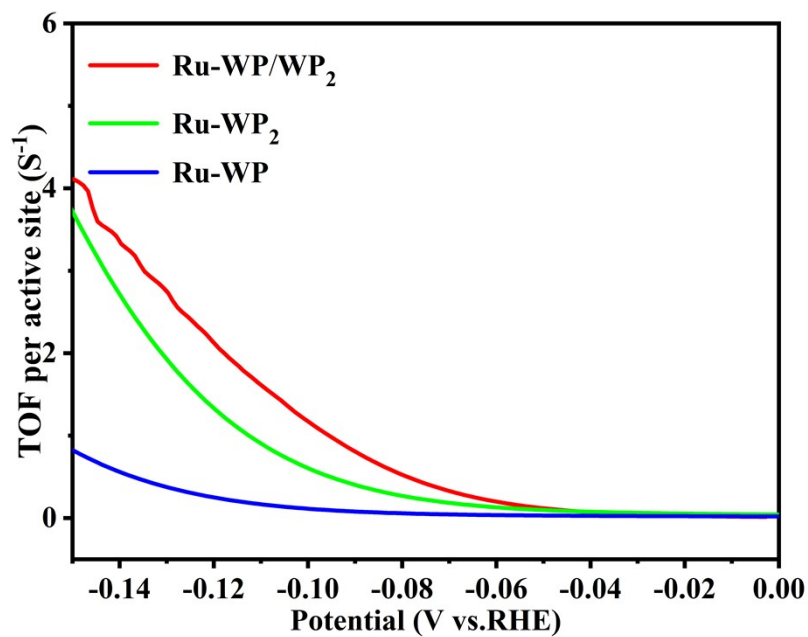

Fig. S13. TOF curves of Ru-WP<sub>2</sub>/WP, Ru-WP<sub>2</sub> and Ru-WP.



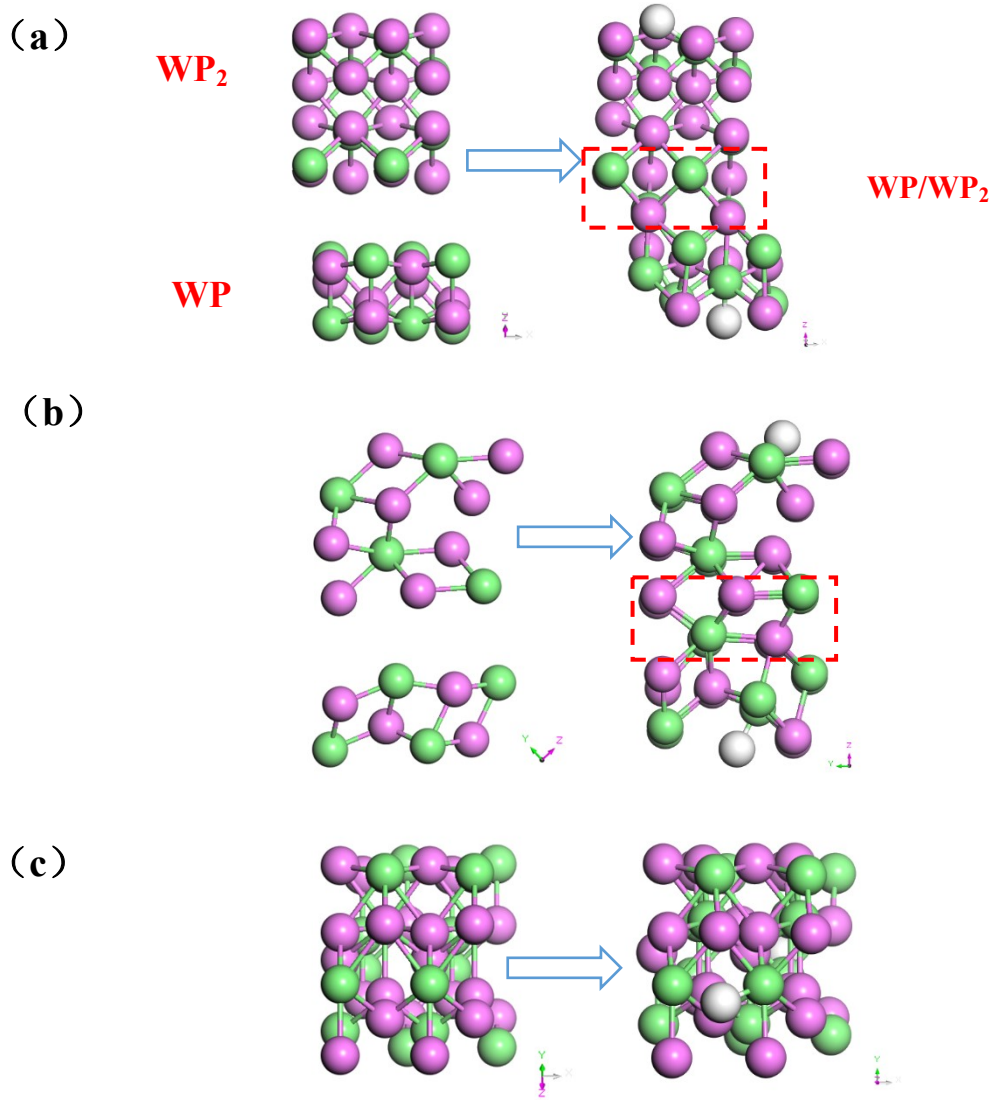

**Fig. S14.** WP/WP<sub>2</sub> optimization front and rear models, the left is optimized before the left is optimized. (a) Front view, (b) Side view, and (c) Top view. White, Green and Pink balls represent H, W and P atoms, respectively. The heterojunction interface and interface atoms were highlighted in (a) and (b).

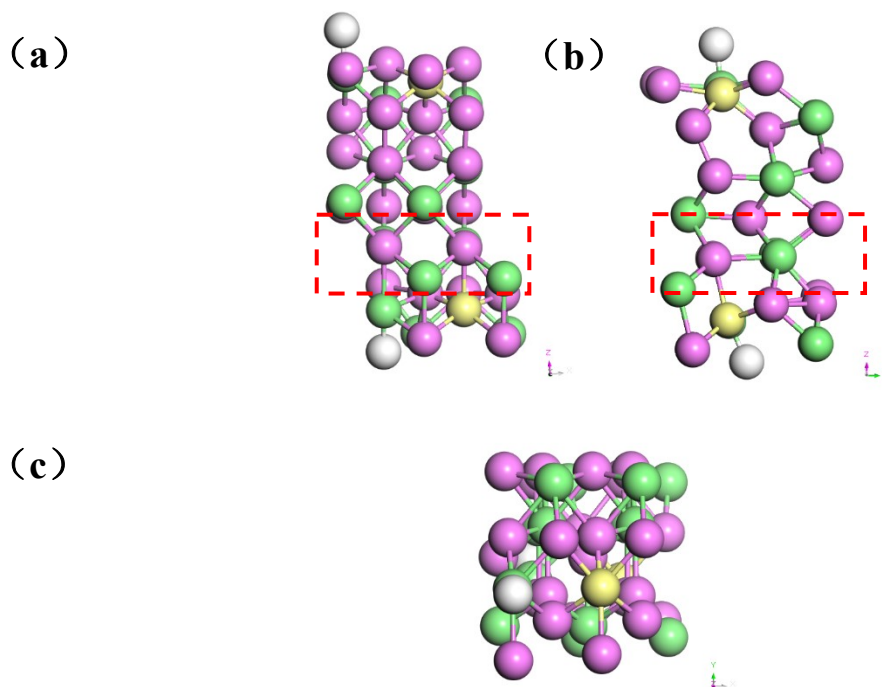

**Fig. S15.** Ru-WP/WP<sub>2</sub> model and after structural optimization. (a) Front view, (b) Side view, and (c) Top view. Yellow, White, Green and Pink balls represents Ru, H, W and P atoms, respectively. The heterojunction interface and interface atoms were

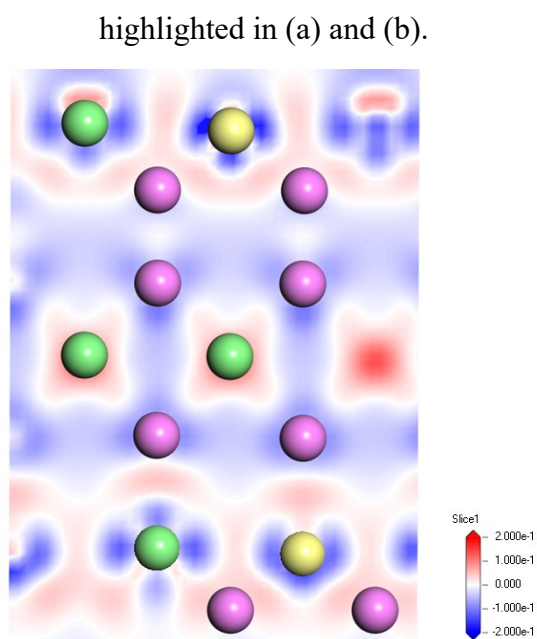

**Fig. S16.** Charge density difference diagram of Ru-WP/WP<sub>2</sub>.

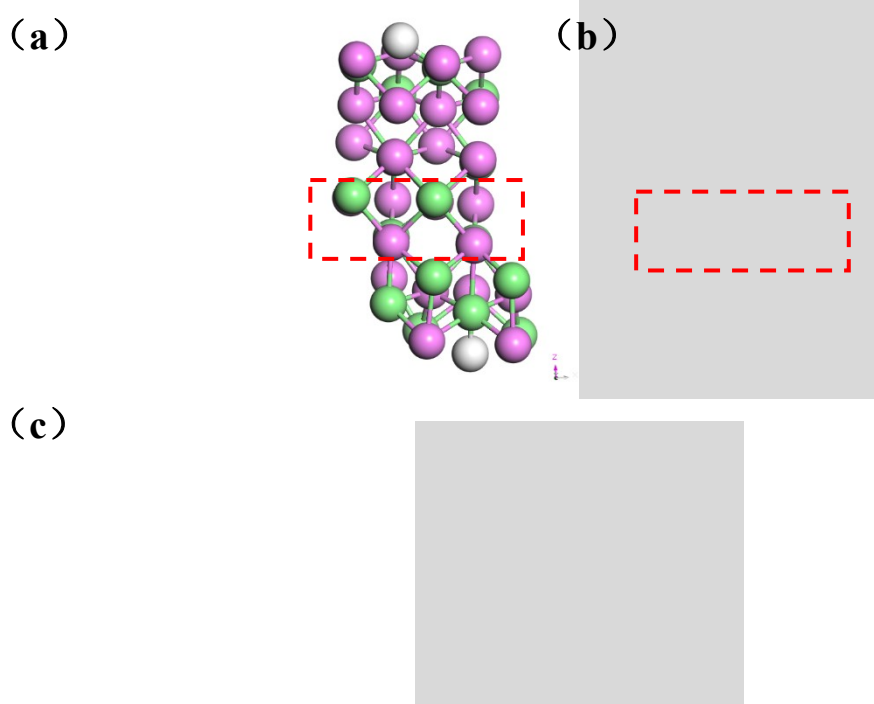

**Fig. S17.** WP/WP<sub>2</sub> model at after structural optimization. (a) Front view, (b) Side view, (c) Top view. White, Green and Pink balls represent H, W, and P atoms, respectively. The heterojunction interface and interface atoms were highlighted in (a) and (b).

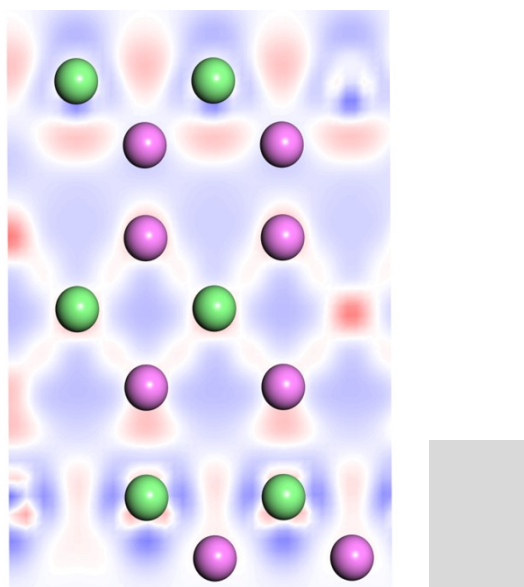

**Fig. S18.** Charge density difference diagram of WP/WP<sub>2</sub>.

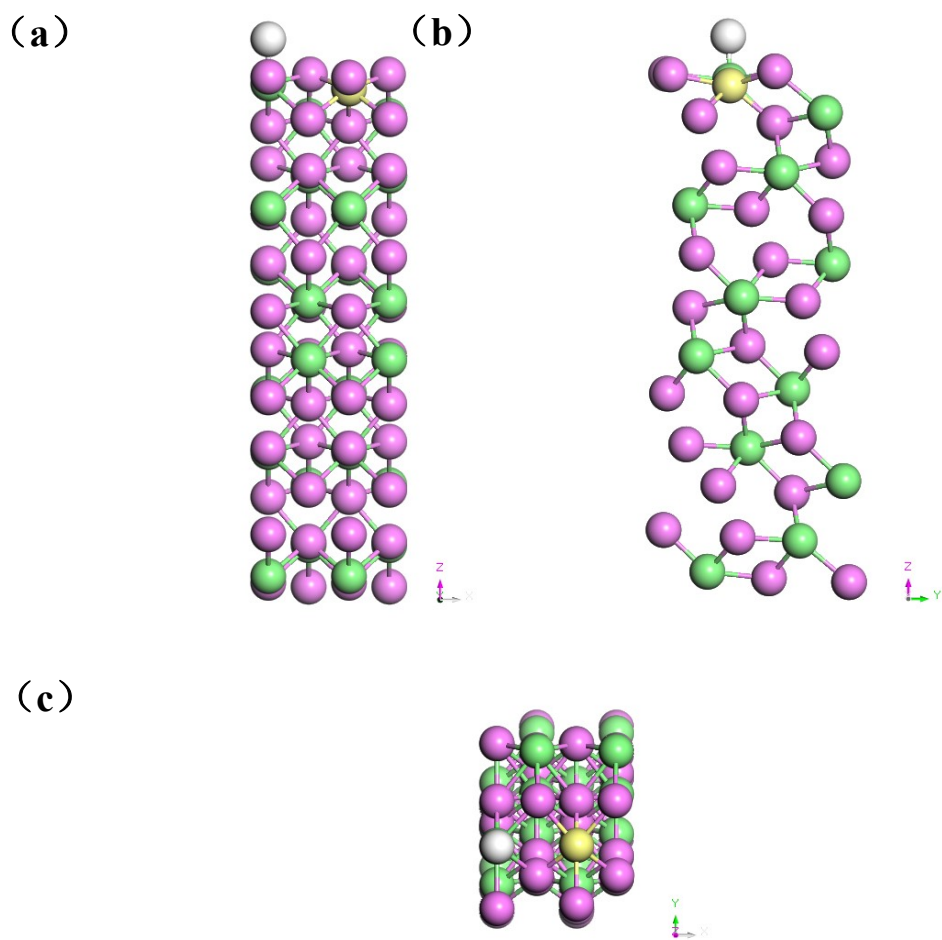

**Fig. S19.** Optimized atomic model for Ru-WP<sub>2</sub> (a) Front view, (b) Side view, and (c) Top view. Yellow, White, Green, and Pink balls represent Ru, H, W and P atoms, respectively.

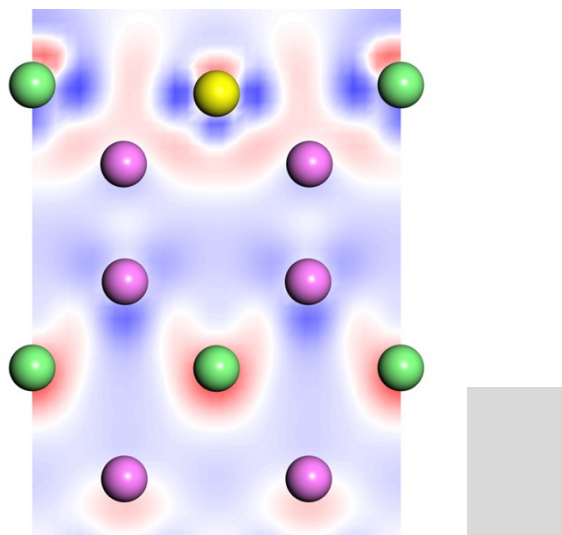

**Fig. S20.** Charge density difference diagram of Ru-WP<sub>2</sub>.

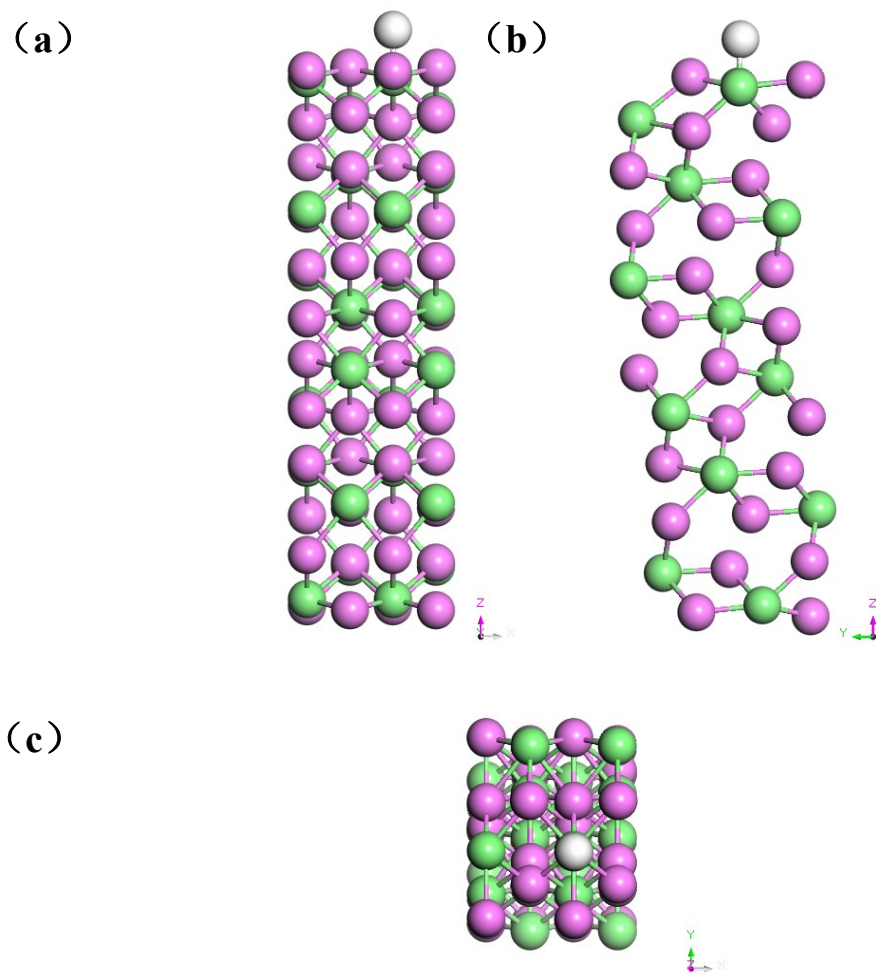

**Fig. S21.**  $WP_2$  model and after structural optimization. (a) Front view, (b) Side view, and (c) Top view. White, Green, and Pink balls represent H, W, and P atoms, respectively.

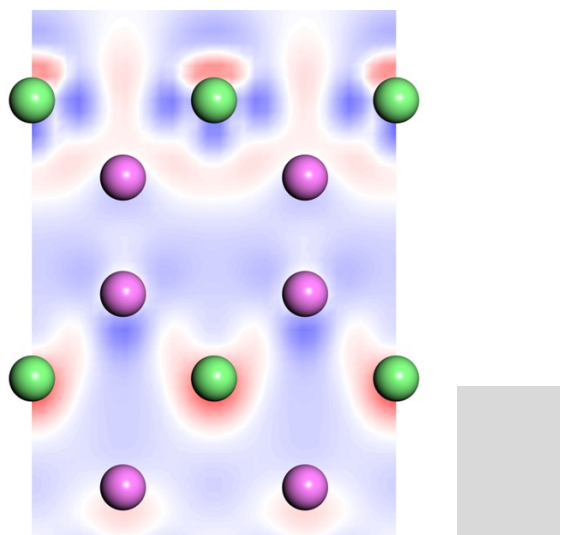

**Fig. S22.** Charge density difference diagram of WP<sub>2</sub>.

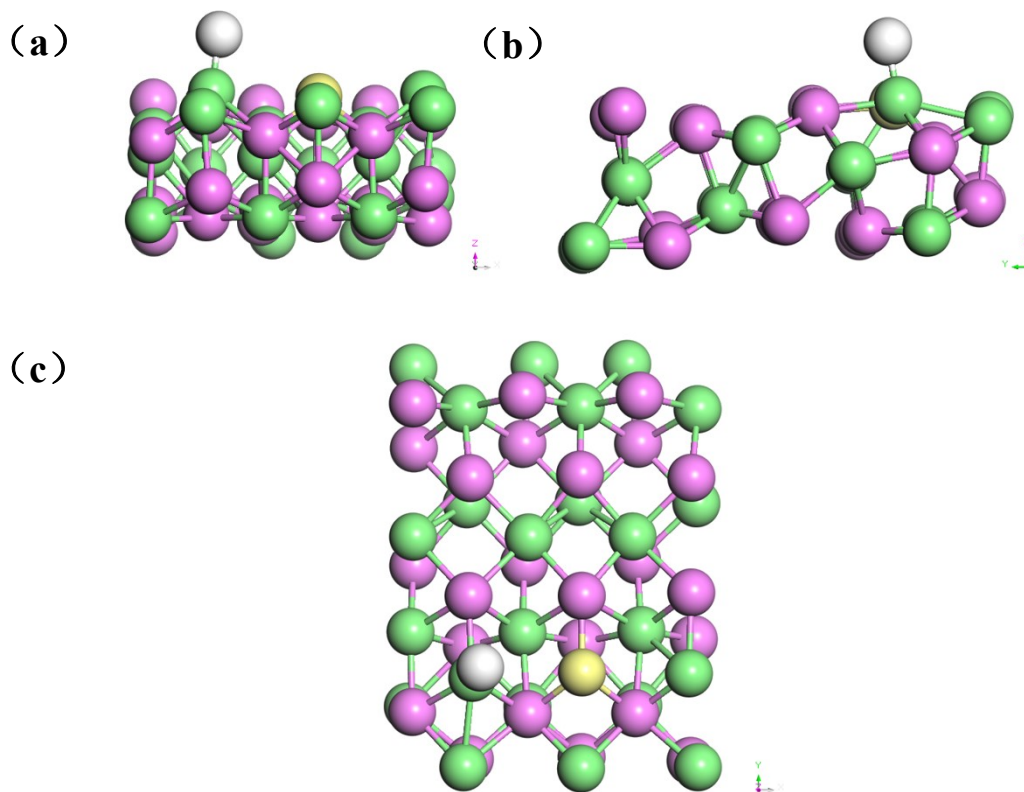

**Fig. S23.** Ru-WP model and after structural optimization. (a) Front view, (b) Side view, and (c) Top view. Yellow, White, Green, and Pink balls represent Ru, H, W, and P atoms, respectively.

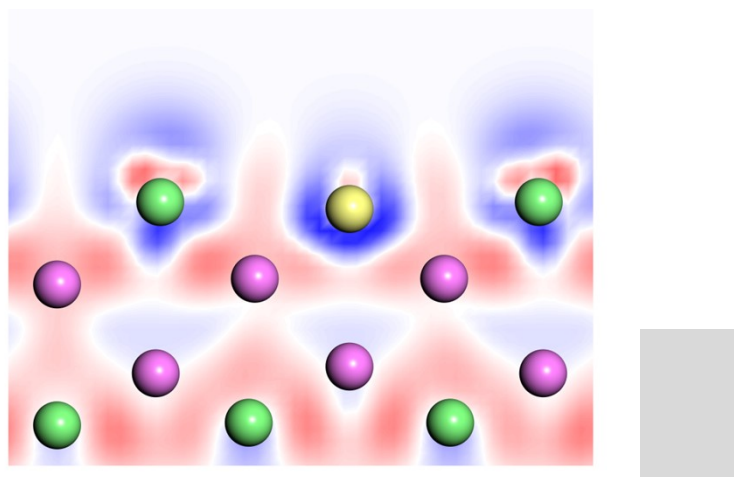

**Fig. S24.** Charge density difference diagram of Ru-WP.



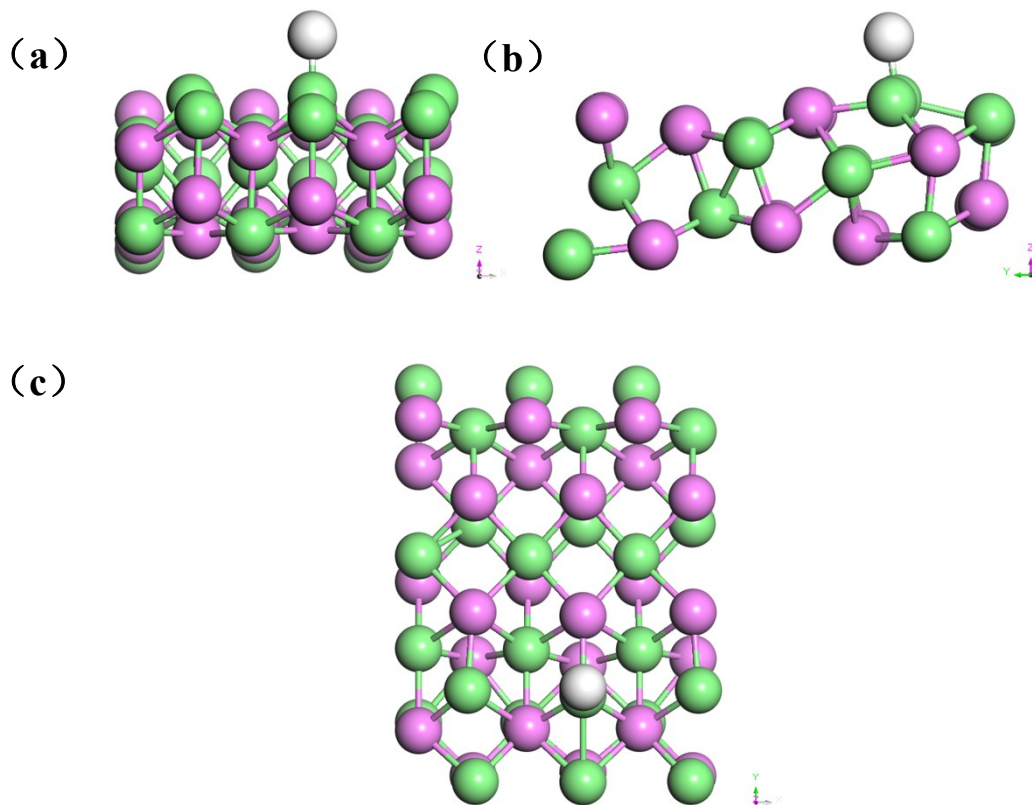

**Fig. S25.** WP model and after structural optimization. (a) Front view, (b) Side view, (c) Top view. White is an H atom, green is W atom and pink is P atom.

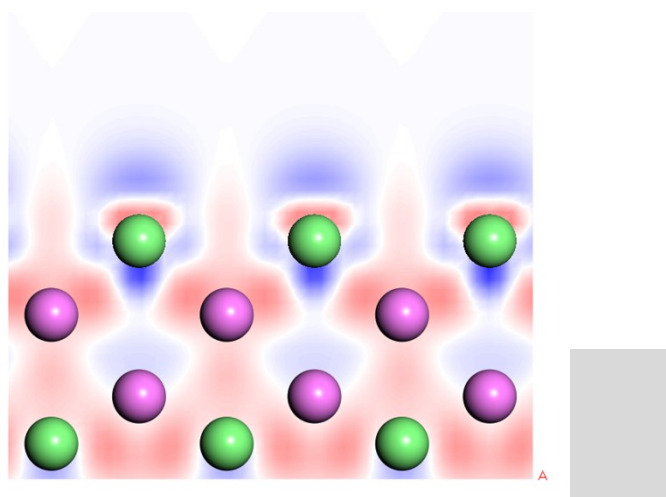

**Fig. S26.** Charge density difference diagram of WP.

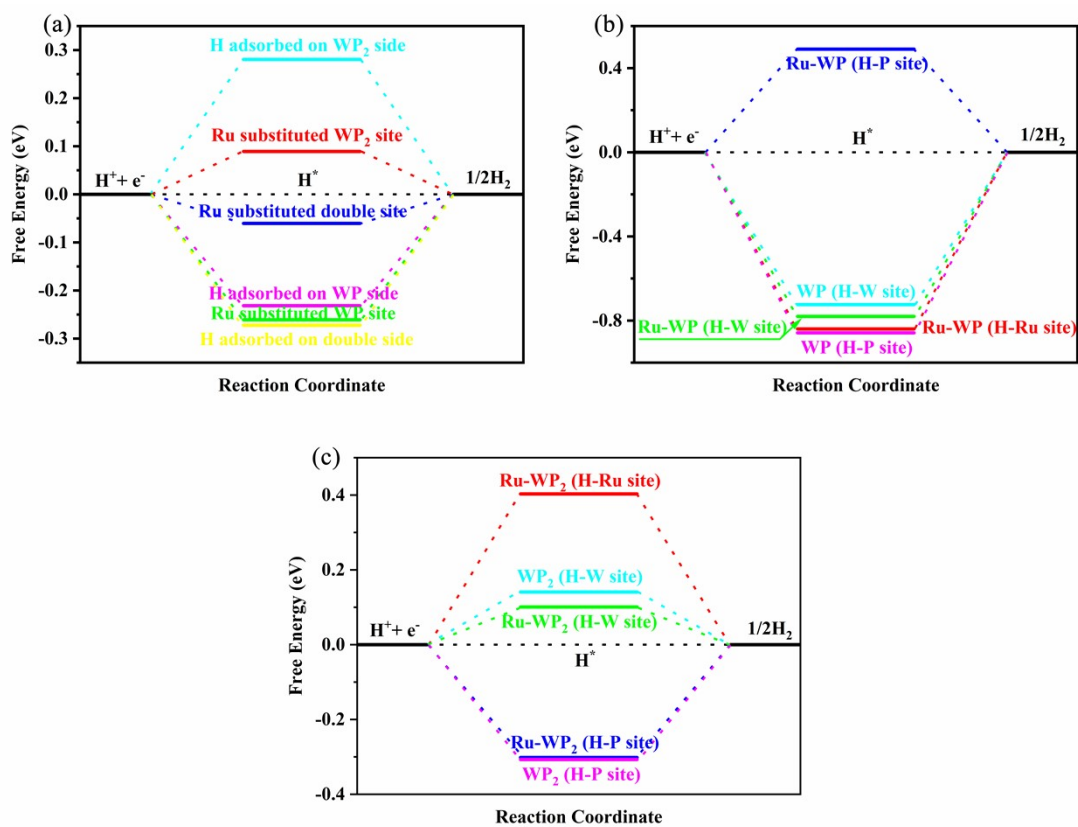

**Fig. S27.** Gibbs free energy volcano diagram of hydrogen adsorption point of catalyst.

(a) Ru-WP/WP<sub>2</sub> NH/CC. (b) Ru-WP NS/CC, and (c) Ru-WP<sub>2</sub> NS/CC.

**Table S1.** Acidic HER performance of catalysts prepared with different Ru: W ratio.

| Electrocatalyst <sup>a</sup> | Overpotential<br>(mV vs. RHE) | Tafel slope<br>(mV dec <sup>-1</sup> ) | R <sub>ct</sub> (Ω) | The atomic ratio of<br>Ru to W <sup>b</sup> |
|------------------------------|-------------------------------|----------------------------------------|---------------------|---------------------------------------------|
| 0                            | 183.8                         | 69.64                                  | 5.26                | 0                                           |
| 0.1%                         | 184.7                         | 72.55                                  | 4.27                | 0.22%                                       |
| 0.5%                         | 180.7                         | 71.09                                  | 4.17                | 0.61%                                       |
| 1%                           | 131.1                         | 62.78                                  | 3.04                | 2.6%                                        |
| 3%                           | 58.0                          | 47.98                                  | 2.20                | 4.2%                                        |
| 5%                           | 94.7                          | 62.53                                  | 3.19                | 5.61%                                       |
| 7%                           | 100.4                         | 53.53                                  | 7.10                | 6.1%                                        |

<sup>a</sup>The Ru: W ratio% joined when the catalyst was prepared.

<sup>b</sup>The results of ICP data analysis

**Table S2.** Acidic HER activities of Ru-WP/WP<sub>2</sub> NH/CC catalysts prepared at different phosphating temperatures. (Temperature effect on optimized Ru-WP/WP<sub>2</sub> NH/CC)

| Electrocatalyst <sup>a</sup> | Overpotential (mV vs. RHE) | Tafel slope(mV dec <sup>-1</sup> ) | R <sub>ct</sub> (Ω) |
|------------------------------|----------------------------|------------------------------------|---------------------|
| 550                          | 201.2                      | 71.11                              | 6.21                |
| 600                          | 134.9                      | 71.04                              | 5.52                |
| 650                          | 94.1                       | 52.49                              | 4.19                |
| 700                          | 58.0                       | 47.98                              | 2.20                |
| 750                          | 108.8                      | 55.19                              | 3.45                |

<sup>a</sup> The catalysts of prepared at different phosphating temperatures.

**Table S3.** Summarized HER performance of some previously reported catalysts with present work.

| Electrocatalyst                                    | Overpotential<br>(mV vs. RHE) | Tafel slope<br>(mV dec <sup>-1</sup> ) | Reference |
|----------------------------------------------------|-------------------------------|----------------------------------------|-----------|
| Ru-WP/WP <sub>2</sub>                              | 58                            | 47.98                                  | This work |
| ES-WC/W <sub>2</sub> C                             | 75                            | 59                                     | [1]       |
| NiP <sub>2</sub> /CoP <sub>2</sub>                 | 71                            | 48.5                                   | [2]       |
| Mo <sub>2</sub> C@MoS <sub>2</sub>                 | 67                            | 67                                     | [3]       |
| CoP <sub>3</sub> /CoMoP/NF                         | 125                           | 61.1                                   | [4]       |
| MoS <sub>2</sub> -MoP                              | 102                           | 58                                     | [5]       |
| CoP/Co-MOF                                         | 52                            | 49                                     | [6]       |
| Co-Mo <sub>5</sub> N <sub>6</sub>                  | 19                            | 29                                     | [7]       |
| CoP/NiCoP                                          | 133                           | 88                                     | [8]       |
| Se-MnS/NiS                                         | 56                            | 55                                     | [9]       |
| Ru-NiCoP/NF                                        | 44                            | 45.4                                   | [10]      |
| Ru-CuO/MoS <sub>2</sub>                            | 198                           | 113                                    | [11]      |
| Ru-Zn <sub>3</sub> V <sub>3</sub> O <sub>8</sub>   | 70                            | 50.6                                   | [12]      |
| Ru-FeCoP                                           | 45                            | 32.1                                   | [13]      |
| Ru-VN                                              | 134                           | 35                                     | [14]      |
| Ru-NMCNs-T                                         | 28                            | 35.2                                   | [15]      |
| Pd-Ru@NG                                           | 42                            | 73                                     | [16]      |
| Ru@B-Ti <sub>3</sub> C <sub>2</sub> T <sub>x</sub> | 62.9                          | 100                                    | [17]      |

---

|                           |     |      |      |
|---------------------------|-----|------|------|
| Ru/CoO                    | 55  | 72   | [18] |
| NiFe-P                    | 44  | 80   | [19] |
| WP <sub>2</sub> NW/NF     | 130 | 94   | [20] |
| Ni-WP <sub>2</sub> NS/CC  | 110 | 65   | [21] |
| CoWP-CA/KB                | 111 | 58   | [22] |
| WP-Mesop                  | 104 | 58   | [23] |
| Co/WP <sub>2</sub> NWs    | 72  | 52   | [24] |
| W-Ni <sub>2</sub> P NS/CC | 71  | 67.4 | [25] |
| P-WP <sub>2</sub> NSs/GP  | 155 | 66   | [26] |
| C-WP/W                    | 109 | 79.8 | [27] |

---

**Table S4. Gibbs free energy of adsorbed hydrogen at each point of the catalyst.**

| Electrocatalyst    | Adsorption site of H | $\Delta G_{H^*}$ (eV) |
|--------------------|----------------------|-----------------------|
| Pt                 | Pt                   | -0.09                 |
| Ru-WP              | Ru                   | -0.84                 |
|                    | W                    | -0.71                 |
|                    | P                    | 0.49                  |
| WP                 | W                    | -0.72                 |
|                    | P                    | -0.86                 |
| Ru-WP <sub>2</sub> | Ru                   | 0.40                  |
|                    | W                    | -0.10                 |
|                    | P                    | -0.3                  |
| WP <sub>2</sub>    | Ru                   | 0.14                  |
|                    | W                    | -0.31                 |

**Table S5.** Gibbs free energy of adsorbed hydrogen with different Ru substitution sites in Ru-WP/WP<sub>2</sub> heterojunction. When Ru is doped, H is adsorbed on the W atom next to Ru.

| Electrocatalyst                                           | Ru Substitution Sites                                |                                                           | $\Delta G_{H^*}$ (eV) |        |
|-----------------------------------------------------------|------------------------------------------------------|-----------------------------------------------------------|-----------------------|--------|
| Ru-WP/WP <sub>2</sub>                                     | Ru substituted<br>WP <sub>2</sub> side               | H adsorbed on WP <sub>2</sub> side                        | 0.089                 |        |
|                                                           |                                                      | H adsorbed on WP side                                     | -0.241                |        |
|                                                           | Ru substituted<br>WP side                            | H adsorbed on WP <sub>2</sub> side                        | 0.175                 |        |
|                                                           |                                                      | H adsorbed on WP side                                     | -0.261                |        |
|                                                           | Both WP and<br>WP <sub>2</sub> are<br>replaced by Ru | H adsorbed on WP <sub>2</sub> side                        | 0.119                 |        |
|                                                           |                                                      | H adsorbed on WP side                                     | -0.235                |        |
|                                                           |                                                      | H adsorption on both sides of<br>WP and WP <sub>2</sub> . | -0.06                 |        |
|                                                           | WP/WP <sub>2</sub>                                   | H adsorbed on WP <sub>2</sub> side                        |                       | 0.281  |
|                                                           |                                                      | H adsorbed on WP side                                     |                       | -0.232 |
| H adsorption on both sides of<br>WP and WP <sub>2</sub> . |                                                      | -0.272                                                    |                       |        |



## References

- [1] Z. Chen, W. Gong, S. Cong, Z. Wang, G. Song, T. Pan, X. Tang, J. Chen, W. Lu, Z. Zhao, *Nano Energy* 68 (2020) 104335.
- [2] M. Patel, M. Ali, J. Ahmad, M. Dar, K. Majid, S. Lone, D. Puthusseri, M. Wahid, *Mater. Lett.* 278 (2020) 128456.
- [3] S. Yang, Y. Wang, H. Zhang, Y. Zhang, L. Liu, L. Fang, X. Yang, X. Gu, Y. Wang, *J. Catal.* 371 (2019) 20-26.
- [4] D. Jiang, Y. Xu, R. Yang, D. Li, S. Meng, M. Chen, *ACS Sustain. Chem. Eng.* 7 (2019) 9309-9317.
- [5] Z. Wu, J. Wang, K. Xia, W. Lei, X. Liu, D. Wang, *J. Mater. Chem. A* 6 (2018) 616-622.
- [6] Q. Li, Y. Zhou, C. Chen, Q. Liu, J. Huo, H. Yi, *J. Electroanal. Chem.* 895 (2021).
- [7] F. Lin, Z. Dong, Y. Yao, L. Yang, F. Fang, L. Jiao, *Adv. Energy Mater.* 10 (2020) 2002176.
- [8] Y. Lin, K. Sun, S. Liu, X. Chen, Y. Cheng, W. C. Cheong, Z. Chen, L. Zheng, J. Zhang, X. Li, Y. Pan, C. Chen, *Adv. Energy Mater.* 9 (2019) 1901213.
- [9] J. Zhu, M. Sun, S. Liu, X. Liu, K. Hu, L. Wang, *J. Mater. Chem. A* 7 (2019) 26975-26983.
- [10] D. Chen, R. Lu, Z. Pu, J. Zhu, H.-W. Li, F. Liu, S. Hu, X. Luo, J. Wu, Y. Zhao, S. Mu, *Appl. Catal. B* 279 (2020) 119396.
- [11] A. Maiti, S. K. Srivastava, *ACS Appl. Nano Mater.* 4 (2021) 7675-7685.
- [12] X. Zhou, X. Tang, H. Xu, T. Jiang, K. Hu, H. J. Qiu, X. Lin, *Nanoscale* 13 (2021) 17457-17464.
- [13] H. Liu, X. Li, L. Ge, C. Peng, L. Zhu, W. Zou, J. Chen, Q. Wu, Y. Zhang, H. Huang, J. Wang, Z. Cheng, Z. Fu, Y. Lu, *Catal. Sci. Technol.* 10 (2020) 8314-8324.
- [14] W. Wang, Y. Shao, Z. Wang, Z. Yang, Z. Zhen, Z. Zhang, C. Mao, X. Guo, G. Li, *ChemElectroChem* 7 (2020) 1201-1206.
- [15] J. Peng, Y. Chen, K. Wang, Z. Tang, S. Chen, *Int. J. Hydrogen Energy* 45 (2020) 18840-18849.
- [16] B. K. Barman, B. Sarkar, K. K. Nanda, *Chem. Commun.* 55 (2019) 13928-13931.

- [17] M. Bat-Erdene, M. Batmunkh, B. Sainbileg, M. Hayashi, A. S. R. Bati, J. Qin, H. Zhao, Y. L. Zhong, J. G. Shapter, *Small* 17 (2021) e2102218.
- [18] J.-X. Guo, D.-Y. Yan, K.-W. Qiu, C. Mu, D. Jiao, J. Mao, H. Wang, T. Ling, J. *Energy Chem.* 37 (2019) 143-147.
- [19] M. Qu, Y. Jiang, M. Yang, S. Liu, Q. Guo, W. Shen, M. Li, R. He, *Appl. Catal. B* 263 (2020) 118324.
- [20] F. Meng, Y. Yu, D. Sun, L. Li, S. Lin, L. Huang, W. Chu, S. Ma, B. Xu, *Appl. Surf. Sci.* 546 (2021) 148926.
- [21] W. Liu, P. Geng, S. Li, W. Liu, D. Fan, H. Lu, Z. Lu, Y. Liu, *J. Energy Chem.* 55 (2021) 17-24.
- [22] D. Huo, Z. Sun, Y. Liu, Z. Yu, Y. Wang, A. Wang, *ACS Sustain. Chem. Eng.* 9 (2021) 12311-12322.
- [23] F. Li, C. Wang, X. Han, X. Feng, Y. Qu, J. Liu, W. Chen, L. Zhao, X. Song, H. Zhu, H. Chen, M. Zhao, Z. Deng, J. Wu, P. Zhang, L. Gao, *ACS Appl. Mater. Interfaces* 12 (2020) 22741-22750.
- [24] Y. Yang, X. Feng, Z. Liu, X. Zhang, H. Song, C. Pi, B. Gao, P. K. Chu, K. Huo, *ChemElectroChem* 8 (2021) 1658-1664.
- [25] S. Li, Y. Liu, Y. Wu, X. Du, J. Guan, L. Wang, M. Zhang, *Int. J. Hydrogen Energy* 46 (2021) 37152-37161.
- [26] M. Pi, W. Guo, T. Wu, X. Wang, D. Zhang, S. Wang, S. Chen, *J. Power Sources* 364 (2017) 253-257.
- [27] L. Wu, Z. Pu, Z. Tu, I. S. Amiin, S. Liu, P. Wang, S. Mu, *Chem. Eng. J.* 327 (2017) 705-712.
